# Supplementary material for: Proteasomal degradation of the tumour suppressor FBW7 requires branched ubiquitylation by TRIP12
Source: PubMed Central journal article supplement (PMC8024278; doi:10.1038/s41467-021-22319-5), 2021-04-06
Supplement: 41467_2021_22319_MOESM1_ESM.pdf [file 41467_2021_22319_MOESM1_ESM.pdf]

# Supplementary Figure 1

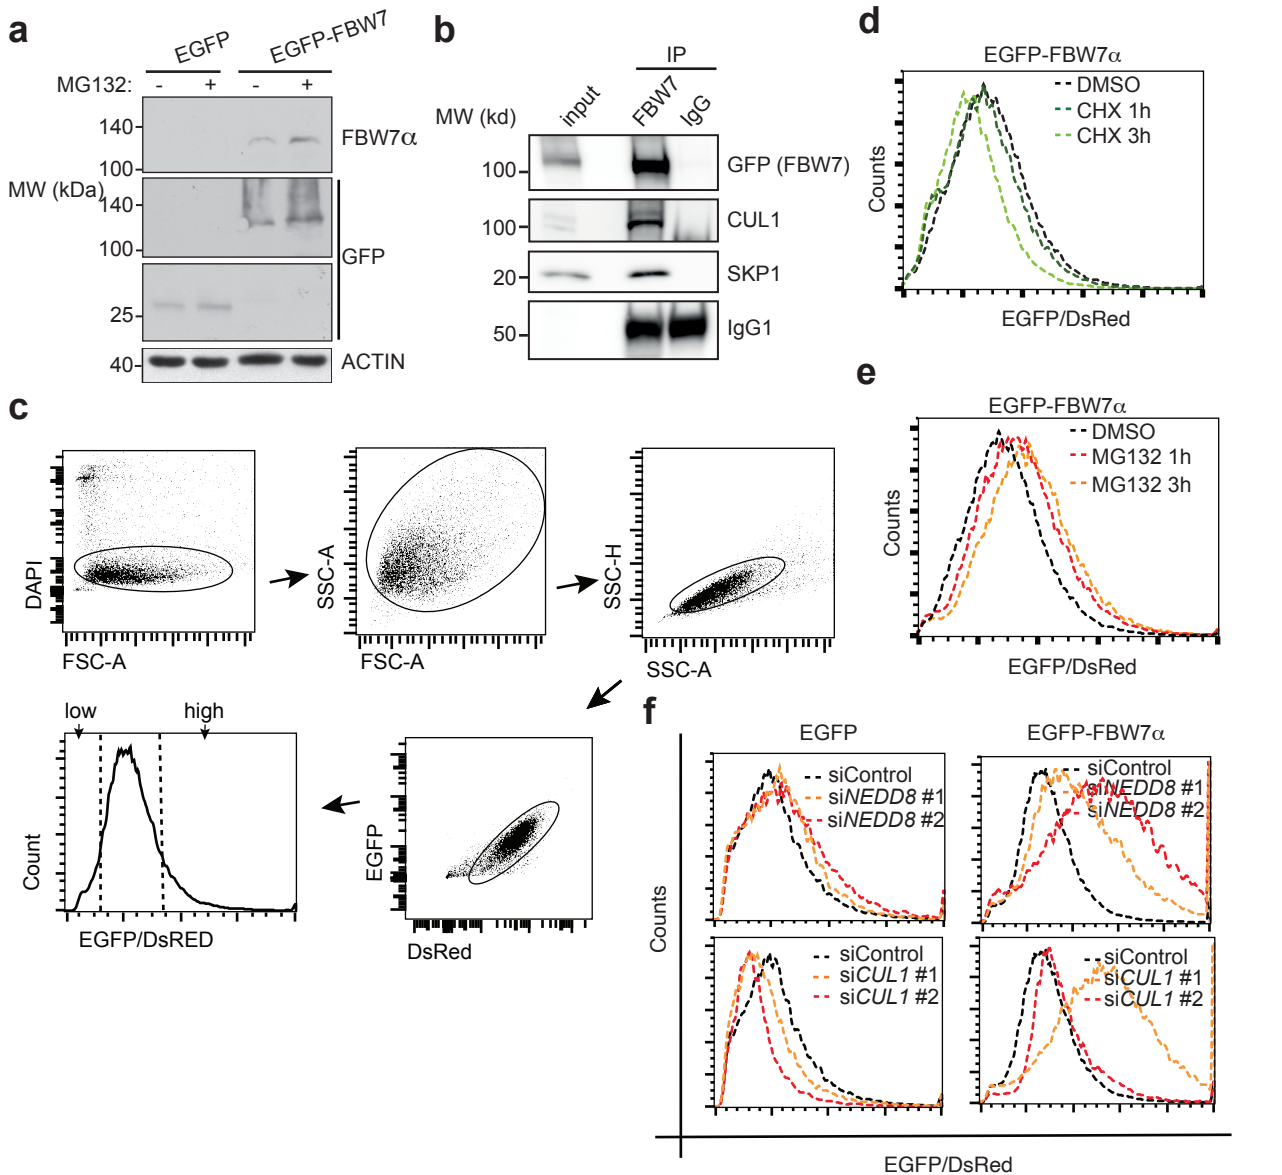

**Supplementary Figure 1, related to Figure 1:** Validation of FACS-based approach to assay FBW7 protein stability. **(a)** Western blot validation of DsRed-IRES-EGFP-FBW7 $\alpha$  construct. **(b)** Co-IP/Western blot confirmation of EGFP-FBW7 $\alpha$  interacting with its endogenous SKP1/CUL1 partners. **(c)** Gating strategy for FACS sorting and validation of selected hits. DAPI negative > SSC-A vs FSC-A > SSC-H vs SSC-A > EGFP+/RFP+ (double positive) > EGFP/DsRed cells were sorted in 2 bins based on a low or a high EGFP/DsRed ratio. Similar gating was done for validation of selected hits except sorting **(d, e)** FACS validation of DsRed-IRES-EGFP-FBW7 $\alpha$  plasmid in the presence of a proteasome inhibitor (MG132) and a protein translation inhibitor (CHX). **(f)** FACS analysis validating CUL1 and NEDD8 as negative regulators of EGFP-FBW7 $\alpha$  protein. Data are representative of at least 3 independent experiments.

## Supplementary Figure 2

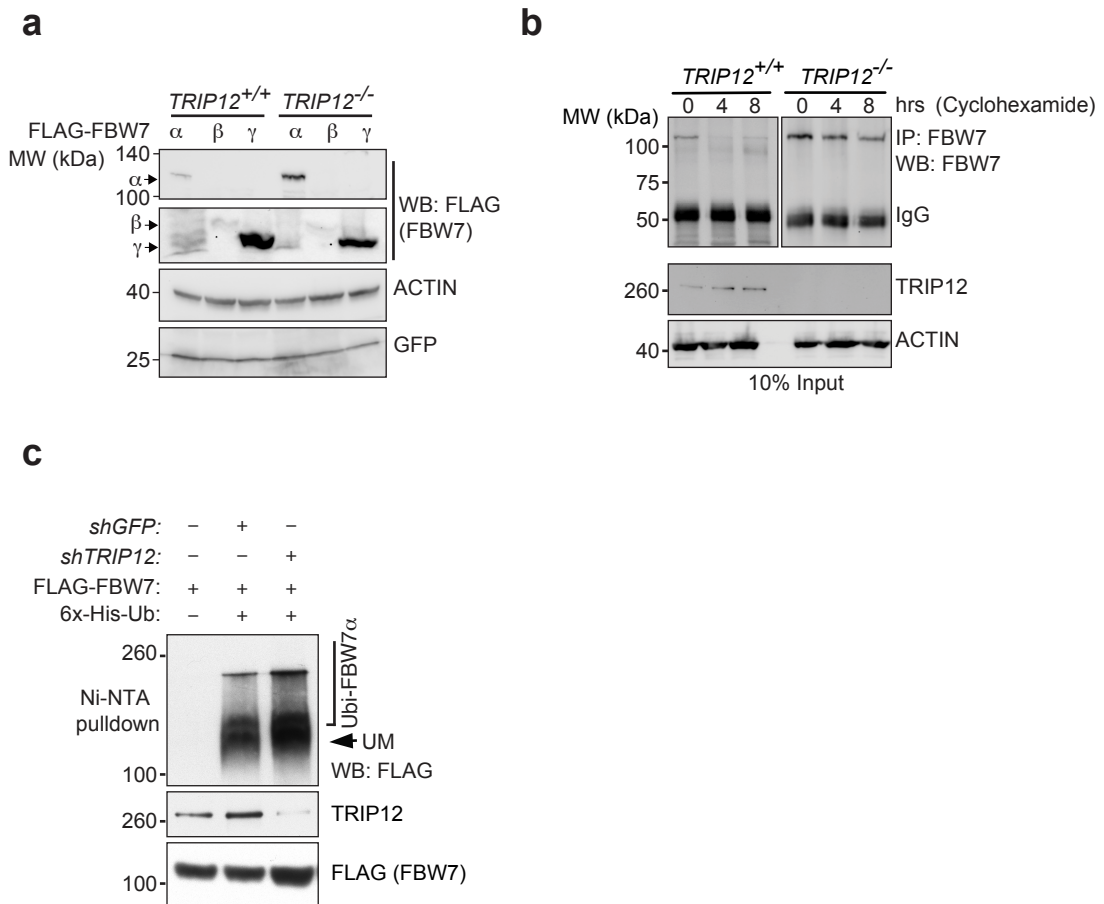

**Supplementary Figure 2, related to Figure 2:** Western blots for FBW7 isoforms, endogenous FBW7 stability and ubiquitylated FLAG-FBW7. **(a)** Western blots from lysates of HEK293T *TRIP12*<sup>+/+</sup> and *TRIP12*<sup>-/-</sup> cells transfected with the indicated FLAG-tagged FBW7 isoforms. GFP plasmid was used as transfection control and subsequently GFP and Actin blots were used as loading controls. **Note:** non-continuous gels spliced together due to low signal from highly labile FLAG-FBW7 $\beta$ . **(b)** Protein stability of endogenous-FBW7 in *TRIP12*<sup>+/+</sup> and *TRIP12*<sup>-/-</sup> cells as judged by western blots of immunoprecipitated FBW7. **(c)** Ni-NTA pulldowns of His-ubiquitylated FLAG-FBW7 in indicated shRNA treated cells. Blots are representative of at least 3 independent experiments in all panels.

## Supplementary Figure 3

**a**

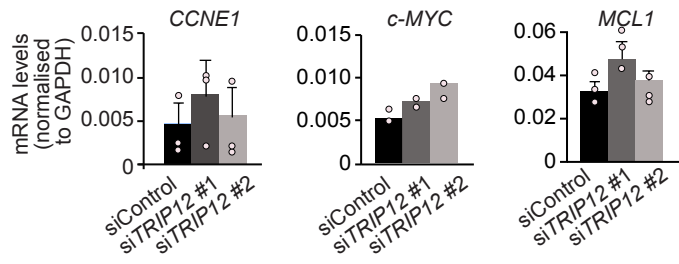

**b**

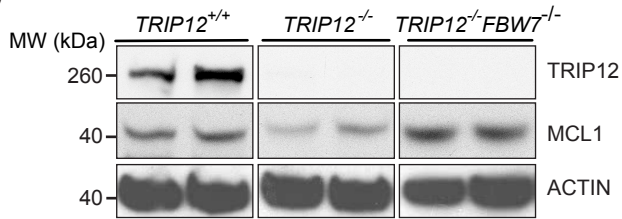

**Supplementary Figure 3, related to Figure 3:** qPCR of *FBW7* indicated substrates and western blots for *MCL1* in *TRIP12*-deficient cells. **(a)** mRNA expression data of the indicated genes in HEK293T cells incubated with the indicated siRNAs. Data represents Mean  $\pm$  SD of  $n = 3$  independent experiments except for *c-MYC* which was repeated twice with similar results. **(b)** Western blots from lysates of HCT116 cells with the indicated genotypes for *TRIP12* and *MCL1*. Actin was used as loading control. Blots are representative of at least 2 independent experiments performed in duplet for each genotype.

# Supplementary Figure 4

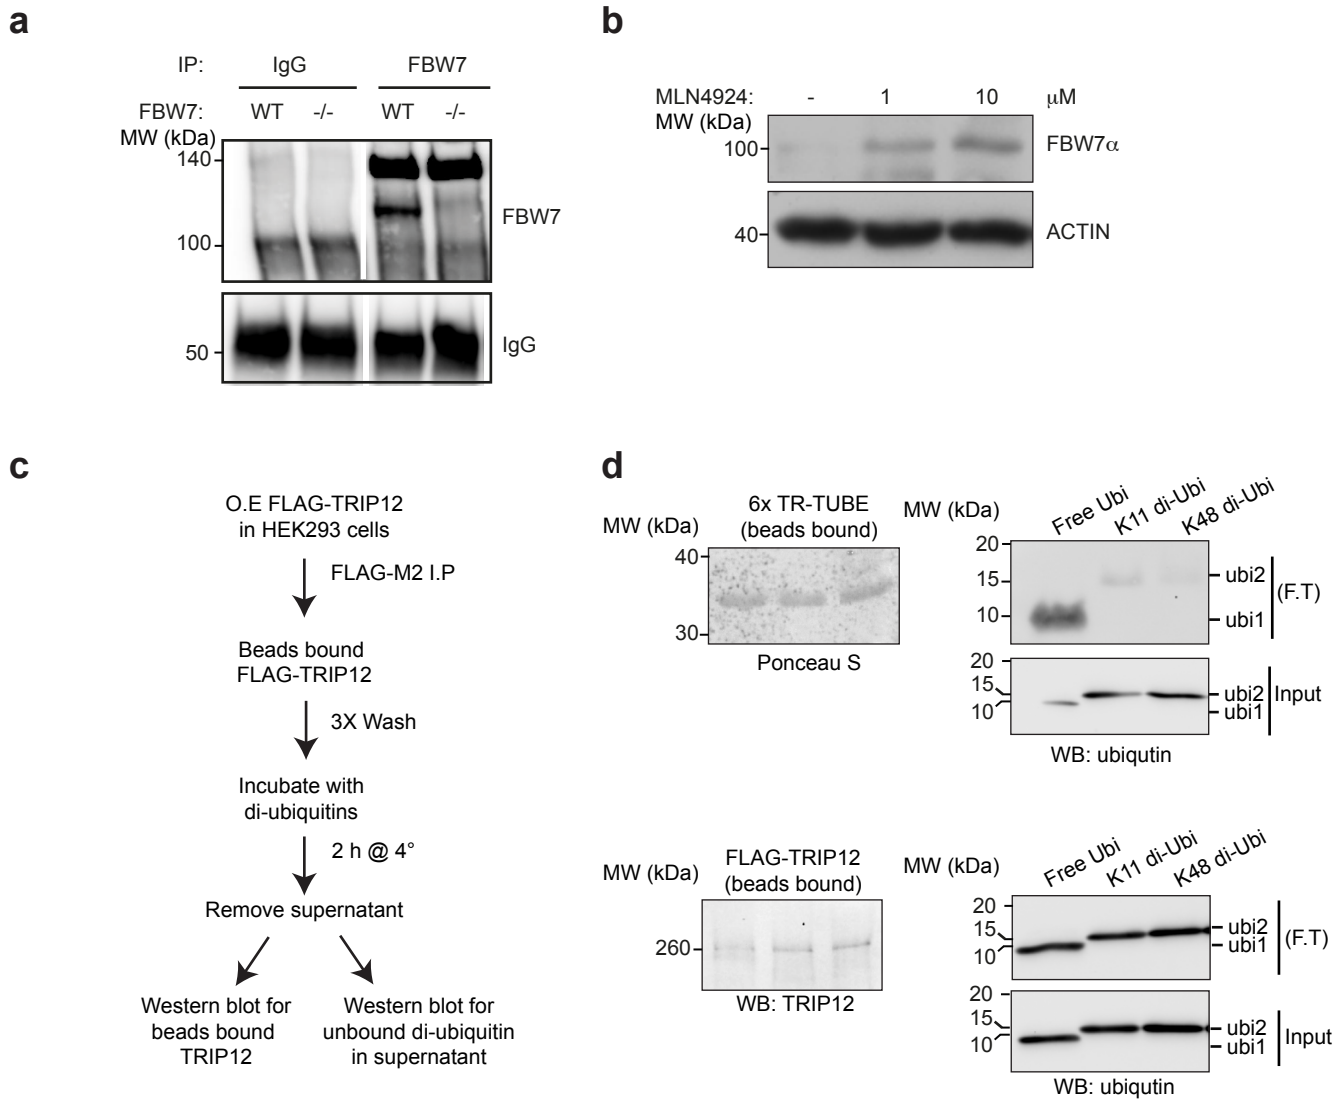

**Supplementary Figure 4, related to Figure 4:** Validation of endogenous FBW7 immunoprecipitation and lack of ubiquitin binding domain (UBD) in TRIP12. **(a)** Validation of endogenous FBW7 IP in  $FBW7^{+/+}$  and  $FBW7^{-/-}$  HCT116 cell lysates. Vertical white lines indicate splicing out of irrelevant lane in the middle of the blots. Samples were run on the same gel and processed in parallel. **(b)** Western blot confirmation of MLN4924 stabilizing FBW7 $\alpha$  protein in HEK293T cells **(c)** Scheme for in vitro pull-down of diubiquitins of indicated linkages by beads bound full-length TRIP12, O.E = overexpression. **(d)** Western blots against indicated proteins showing lack of UBD in TRIP12, F.T (Flow through) compared to the positive control 6x-TR-TUBE which efficiently binds and remove diubiquitins from the supernatant. Blots are representative of 3 independent experiments.

# Supplementary Figure 5

**a**

FBW7 lysines identified by mass spectrometry

| Position | PEP                   | No. of GlyGly(K) | GlyGly(K) probabilities          |
|----------|-----------------------|------------------|----------------------------------|
| 171      | $3.5 \times 10^{-13}$ | 1                | K(1)LDHGSEVR                     |
| 186      | $5.2 \times 10^{-15}$ | 1                | KPCKVSEYTSTTG<br>LVPCSATPTTFGDLR |
| 343      | $9.5 \times 10^{-05}$ | 1                | VIK(1)PGFIHSPWK                  |
| 404      | $3.5 \times 10^{-04}$ | 1                | IVSGSDDNTLK(1)V<br>WSAVTGTK      |
| 412      | $6.3 \times 10^{-03}$ | 1                | VWSAVTGTK(1)CLR                  |
| 609      | $8.6 \times 10^{-05}$ | 1                | IWDIK(1)TGQCLQT<br>LQGPNK        |
| 622      | $7.6 \times 10^{-05}$ | 1                | TGQCLQTLQGPNK(1)<br>HQSAVTCLQFNK |

**b**

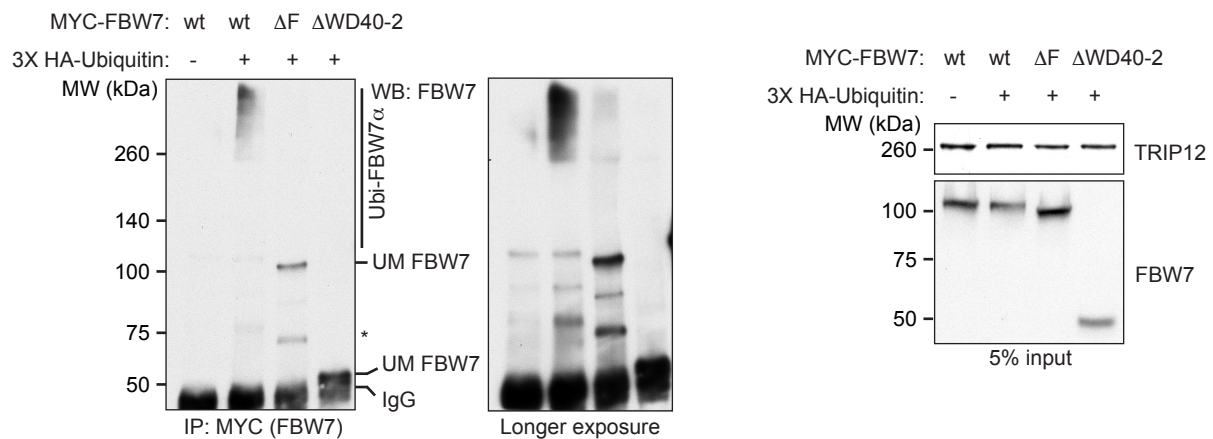

**c**

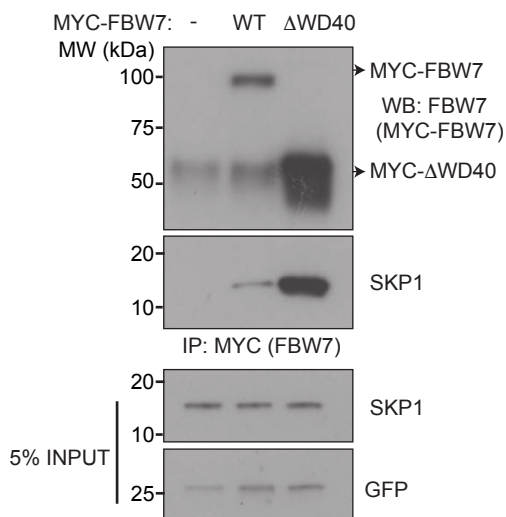

**d**

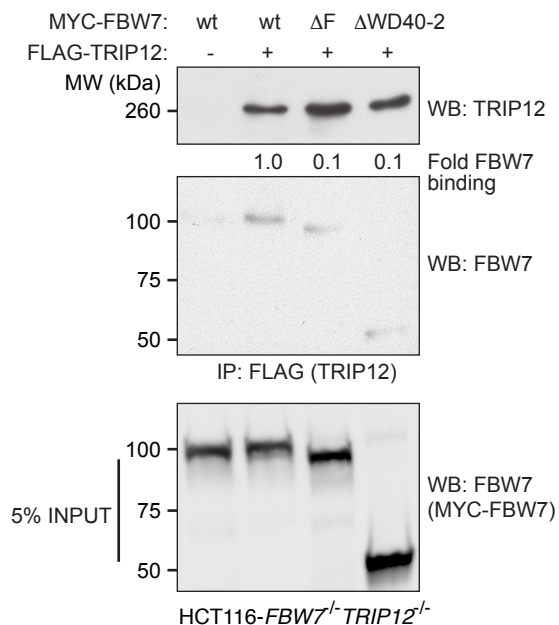

**Supplementary Figure 5, related to Figure 5:** Identification of ubiquitylated FBW7 lysines and TRIP12/FBW7 co-immunoprecipitation. **(a)** List of FBW7 $\alpha$  lysines and their respective peptides identified as ubiquitylated by mass spectrometry. **(b)** MYC pull-down of the indicated FBW7 $\alpha$  wildtype or mutant proteins from HEK293T cells co-expressing 3x HA-ubiquitin and probed with FBW7 $\alpha$  specific antibody. **(c)** Co-IP/Western blot confirmation of MYC-FBW7 $\alpha$  wildtype and  $\Delta$ WD40-2 mutant interacting with their endogenous SKP1 partner. **(d)** Western blots showing interaction of MYC-FBW7 wildtype,  $\Delta$ Fbox mutant, and  $\Delta$ WD402 mutant with FLAG-TRIP12 in HCT116 cells of indicated genotype. Blots are representative of at least 3 independent experiments.

## Supplementary Figure 6

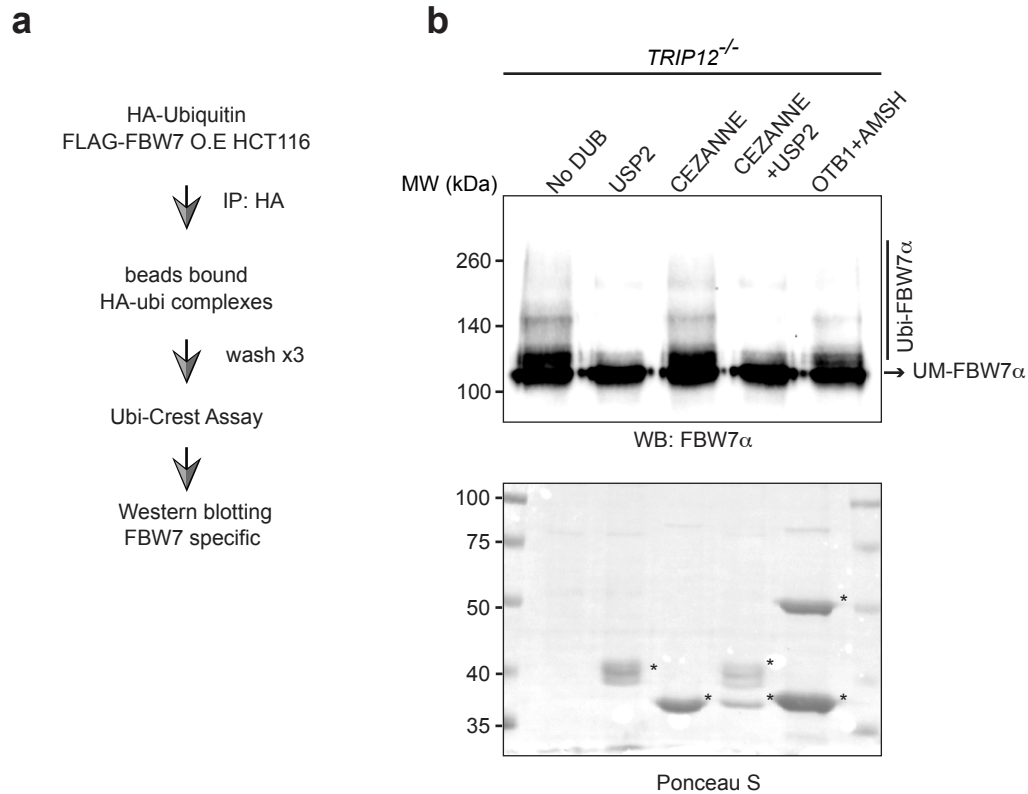

**Supplementary Figure 6, related to Figure 6:** Scheme and western blots for Ubi-Crest experiment on epitope-tagged FBW7. (a) Schematic for Ubi-Crest experiment in (b) on purified HA-ubiquitylated FLAG-FBW7 purified from *TRIP12<sup>-/-</sup>* HCT116 cells. (b) Western blot showing cleavage of beads-bound polyubiquitylated FLAG-FBW7 by the indicated DUBs, UM = unmodified. Blots are representative of at least 2 independent experiments.

## Supplementary Figure 7

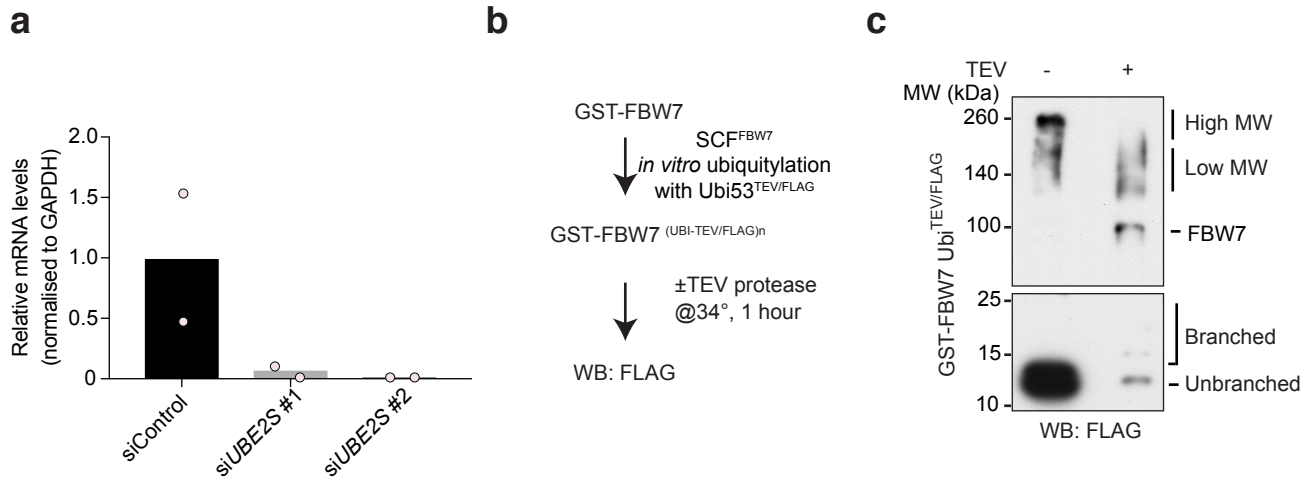

**Supplementary Figure 7, related to Figure 7:** Confirmation of si*UBE2S* by qPCR and control for Ubi53TEV/FLAG TEV-protease experiments. **(a)** qPCR data showing knockdown of *UBE2S* in HEK293T cells incubated with a control and two independent siRNAs targeting *UBE2S*. Data represents Mean of  $n = 2$  independent experiments. **(b)** Scheme for in vitro ubiquitylation and TEV protease cleavage experiment in **(c)**. **(c)** Western blot confirmation of TEV protease cleavage of high molecular weight polyubiTEV/FLAG-FBW7 conjugates generated in an autoubiquitylation reaction. Blot is representative of 2 independent experiments.

**Supplementary Table 1: Primers used in the study**

| Name                      | Sequence                                              | Purpose                                         | Source        |
|---------------------------|-------------------------------------------------------|-------------------------------------------------|---------------|
| FBW7a_At1b1-Fwd           | GGGGACAAGTTTGTACAAAAAAGCAGGCTTTAtgtgtgtcccgagaag      | Gateway cloning of FBW7a                        | Sigma-Aldrich |
| FBW7a_At1b1-Rev           | GGGGACCACTTTGTACAAGAAAGCTGGGTTCACTTCATGTCCACTC        | Gateway cloning of FBW7a                        | Sigma-Aldrich |
| hUbi-Fwd3+AT1B1           | GGGGACAAGTTTGTACAAAAAAGCAGGCTGTCAGATTTTCGTGAAAACCCT   | Gateway cloning of ubiquitinTEV/Flag mutants    | Sigma-Aldrich |
| hUbi-Rev3+AT1B2           | GGGGACCACTTTGTACAAGAAAGCTGGGTTTTAACACCACGAAGTCTCA     | Gateway cloning of ubiquitinTEV/Flag mutants    | Sigma-Aldrich |
| FBW7a_At1b1-Fwd           | GGGGACAAGTTTGTACAAAAAAGCAGGCTTTAtgtgtgtcccgagaag      | Gateway cloning of FBW7a deletion mutant        | Sigma-Aldrich |
| FBW7a_WD40D1 Rev1         | GGGGACCACTTTGTACAAGAAAGCTGGGTTtcatgttaacgtgtgaatgc    | Gateway cloning of FBW7a deletion mutant        | Sigma-Aldrich |
| FBW7a_At1b1-Fwd           | GGGGACAAGTTTGTACAAAAAAGCAGGCTTTAtgtgtgtcccgagaag      | Gateway cloning of FBW7a deletion mutant        | Sigma-Aldrich |
| FBW7a_WD40D2 Rev1         | GGGGACCACTTTGTACAAGAAAGCTGGGTTtcaatataagggtgtatac     | Gateway cloning of FBW7a deletion mutant        | Sigma-Aldrich |
| FBW7a_At1b1-Fwd           | GGGGACAAGTTTGTACAAAAAAGCAGGCTTTAtgtgtgtcccgagaag      | Gateway cloning of FBW7a deletion mutant        | Sigma-Aldrich |
| FBW7a_WD40D3 Rev1         | GGGGACCACTTTGTACAAGAAAGCTGGGTTtcaatgtcccactaatgttc    | Gateway cloning of FBW7a deletion mutant        | Sigma-Aldrich |
| FBW7a_At1b1-Fwd           | GGGGACAAGTTTGTACAAAAAAGCAGGCTTTAtgtgtgtcccgagaag      | Gateway cloning of FBW7a deletion mutant        | Sigma-Aldrich |
| FBW7a_WD40D4 Rev1         | GGGGACCACTTTGTACAAGAAAGCTGGGTTtactcttcttgcatttct      | Gateway cloning of FBW7a deletion mutant        | Sigma-Aldrich |
| FBW7a K404R Fwd           | gacaacactttaaGagtttggtcagc                            | Site directed mutagenesis                       | Sigma-Aldrich |
| FBW7a K404R Rev           | gctgaccaaactCttaaagtgttgc                             | Site directed mutagenesis                       | Sigma-Aldrich |
| FBW7a K412R Fwd           | cagtcacaggcaGatgtctgagaac                             | Site directed mutagenesis                       | Sigma-Aldrich |
| FBW7a K412R Rev           | gttctcagacatCtgctgtgactg                              | Site directed mutagenesis                       | Sigma-Aldrich |
| FBXW7 K404,412R FWD       | ctttaaGagtttggtcagcagtcacaggcaGatg                    | Site directed mutagenesis                       | Sigma-Aldrich |
| FBXW7 K404,412R REV       | catCtgctgtgactgctgaccaaactCttaaag                     | Site directed mutagenesis                       | Sigma-Aldrich |
| TRIP12 delta HECT Fwd     | GGGGACAAGTTTGTACAAAAAAGCAGGCTTTATGTCCAACCGGCCTAAT     | Gateway cloning of human TRIP12 deletion mutant | IDT           |
| TRIP12 delta HECT Rev     | GGGGACCACTTTGTACAAGAAAGCTGGGTTTCAGAAGTGTGAGCAGCCAGAGA | Gateway cloning of human TRIP12 deletion mutant | IDT           |
| TRIP12 delta WWE/HECT Fwd | GGGGACAAGTTTGTACAAAAAAGCAGGCTTTATGTCCAACCGGCCTAAT     | Gateway cloning of human TRIP12 deletion mutant | IDT           |
| TRIP12 delta WWE/HECT Rev | GGGGACCACTTTGTACAAGAAAGCTGGGTTTCATAATGCATTTCTTTGGGC   | Gateway cloning of human TRIP12 deletion mutant | IDT           |
| hUBE2S Fwd                | CATCATCCGCCTGGTGTACAAG                                | qRT-PCR                                         | IDT           |
| hUBE2S Rev                | TAGGGTGGATCAGCAGGCAC                                  | qRT-PCR                                         | IDT           |
| GAPDH Fwd                 | TGAAGCAGGCATCTGAGGG                                   | qRT-PCR                                         | Sigma-Aldrich |
| GAPDH Rev                 | CGAAGGTGGAAGAGTGGGAG                                  | qRT-PCR                                         | Sigma-Aldrich |
| $\beta$ -actin Fwd        | GGATGCAGAAGGAGATCACTG                                 | qRT-PCR                                         | Sigma-Aldrich |
| $\beta$ -actin Rev        | CGATCCACACGGAGTACTTG                                  | qRT-PCR                                         | Sigma-Aldrich |
| c-MYC Fwd                 | CCTAGTGCTGCATGAGGAGA                                  | qRT-PCR                                         | Sigma-Aldrich |
| c-MYC Rev                 | TCTTCCTCATCTTCTTGCTCTTC                               | qRT-PCR                                         | Sigma-Aldrich |
| Cyclin E Fwd              | GCCAGCCTTGGGACAATAATG                                 | qRT-PCR                                         | Sigma-Aldrich |
| Cyclin E Rev              | AGTTTGGGTAAACCCGGTCAT                                 | qRT-PCR                                         | Sigma-Aldrich |
| MCL1 Fwd                  | GTAATAACACCAGTACGGACGG                                | qRT-PCR                                         | Sigma-Aldrich |
| MCL1 Rev                  | TCCCGAAGGT ACCGAGAGAT                                 | qRT-PCR                                         | Sigma-Aldrich |



**Supplementary Table 2:** Oligos used in the study

| Name           | Catalogue number   | Purpose        | Source        |
|----------------|--------------------|----------------|---------------|
| siCOPS5 (CSN5) | SASI_Hs02_00342404 | gene silencing | Sigma-Aldrich |
|                | SASI_Hs01_00209042 | gene silencing | Sigma-Aldrich |
| siTRIP12       | SASI_Hs01_00130068 | gene silencing | Sigma-Aldrich |
|                | SASI_Hs02_00337169 | gene silencing | Sigma-Aldrich |
| siFBW7         | SASI_Hs01_00147263 | gene silencing | Sigma-Aldrich |
|                | SASI_Hs01_00147265 | gene silencing | Sigma-Aldrich |
| siCUL1         | SASI_Hs02_00335921 | gene silencing | Sigma-Aldrich |
|                | SASI_Hs01_00021744 | gene silencing | Sigma-Aldrich |
| siRBX1         | SASI_Hs01_00066597 | gene silencing | Sigma-Aldrich |
|                | SASI_Hs01_00066598 | gene silencing | Sigma-Aldrich |
| siNEDD8        | SASI_Hs01_00117479 | gene silencing | Sigma-Aldrich |
|                | SASI_Hs01_00117480 | gene silencing | Sigma-Aldrich |
| siUBE2S        | SASI_Hs01_00070712 | gene silencing | Sigma-Aldrich |
|                | SASI_Hs01_00070713 | gene silencing | Sigma-Aldrich |

**Supplementary Table 3:** crRNA or gRNA used in the study

| gRNA                               | Sequence                               | Purpose                            | Catalogue No.     | Source        |
|------------------------------------|----------------------------------------|------------------------------------|-------------------|---------------|
| Edit-R Human <i>TRIP12</i> crRNA 1 | Available upon request from the vendor | Gene knockout using CRISPR/Cas9    | CM-007182-01-0002 | Dharmacon     |
| Edit-R Human <i>TRIP12</i> crRNA 2 | Available upon request from the vendor | Gene knockout using CRISPR/Cas9    | CM-007182-02-0002 | Dharmacon     |
| Edit-R Human <i>TRIP12</i> crRNA 3 | Available upon request from the vendor | Gene knockout using CRISPR/Cas9    | CM-007182-03-0002 | Dharmacon     |
| T12_promoter_sgRNA3 Fwd            | CACC GTAGGCATAAAAATAGGCCGA             | CRISPR/SAM TRIP12 locus activation | Not applicable    | Sigma-Aldrich |
| T12_promoter_sgRNA3 Rev            | AAAC TCGGCCTATTTTTATGCCTAC             | CRISPR/SAM TRIP12 locus activation | Not applicable    | Sigma-Aldrich |
| T12_promoter_sgRNA4 Fwd            | CACC CGCTCAAGTTGAGAATTTCA              | CRISPR/SAM TRIP12 locus activation | Not applicable    | Sigma-Aldrich |
| T12_promoter_sgRNA4 Rev            | AAAC TGAAATTCTCAACTTGAGCG              | CRISPR/SAM TRIP12 locus activation | Not applicable    | Sigma-Aldrich |
